# Supplementary material for: Natural Phosphodiesterase-4 Inhibitors with Potential Anti-Inflammatory Activities from Millettia dielsiana
Source: MDPI journal article supplement (doi:10.3390/molecules28217253), 2023-10-25
Supplement: s1 [file s1]

# Natural Phosphodiesterase-4 inhibitors with Potential anti-inflammatory activities from *Millettia dielsiana*

Vu Thi Thu Le<sup>1</sup>, Hoang Van Hung<sup>2</sup>, Nguyen Xuan Ha<sup>3</sup>, Cao Hong Le<sup>1</sup>, Pham Thi Hong Minh<sup>3,4</sup> and Do Tien Lam<sup>3,4\*</sup>

<sup>1</sup> Thai Nguyen University of Agriculture and Forestry, Thai Nguyen University, Quyet Thang, Thai Nguyen 24119, Viet Nam

<sup>2</sup> Thai Nguyen University-Lao Cai Campus, Thai Nguyen University, Lao Cai City, Lao Cai Province 31000, Vietnam

<sup>3</sup> Institute of Natural Products Chemistry, Vietnam Academy of Science and Technology, 18 Hoang Quoc Viet, Cau Giay, Hanoi 10072, Viet Nam

<sup>4</sup> Faculty of Chemistry, Graduate University of Science and Technology, Vietnam Academy of Science and Technology, 18 Hoang Quoc Viet, Cau Giay, Hanoi 10072, Viet Nam

\* Correspondence: dotienlam198@gmail.com; Tel.: (+84)989856515

Table S1: *In silico* Docking of isolated compounds from *Millettia dielsiana* against PDE4A protein

| Compounds | Name                                                                                                             | $\Delta G_{\text{dock}}$ (kcal/mol) |
|-----------|------------------------------------------------------------------------------------------------------------------|-------------------------------------|
| D38       | Millesianin F                                                                                                    | -11.69                              |
| D50       | 5,7,4'-trihydroxyisoflavone 7-O- $\beta$ -D-apiofuranosyl-(1 $\rightarrow$ 6)- $\beta$ -D-glucopyranoside        | -11.68                              |
| D45       | 7-hydroxy-4',8-dimethoxyisoflavone 7-O- $\beta$ -D-apiofuranosyl-(1 $\rightarrow$ 6)- $\beta$ -D-glucopyranoside | -10.97                              |
| D47       | Odoratin-7-O- $\beta$ -D-glucopyranoside                                                                         | -10.86                              |
| D41       | Claclrastin-7-O- $\beta$ -D-glucopyranoside                                                                      | -10.77                              |
| D39       | Millesianin G                                                                                                    | -10.73                              |
| D42       | 7-hydroxy-4',6 dimethoxyisoflavone-7-O- $\beta$ -D-apiofuranosyl-(1 $\rightarrow$ 6)- $\beta$ -D-glucopyranoside | -10.57                              |
| D23       | Hydroxy-6-methoxy-3,4-methylenedioxy-8,3,3-dimethylallyl-isoflavone                                              | -9.97                               |
| D19       | Ichthyone                                                                                                        | -9.93                               |
| D46       | Glycitin                                                                                                         | -9.70                               |
| D25       | Millesianin D                                                                                                    | -9.59                               |
| D24       | Millesianin H                                                                                                    | -9.47                               |
| D48       | Dalpatin                                                                                                         | -9.45                               |
| D30       | Millesianin C                                                                                                    | -9.38                               |
| D18       | Barbigerone                                                                                                      | -9.31                               |
| D49       | Genistin                                                                                                         | -9.28                               |
| D40       | Daidzin                                                                                                          | -9.22                               |
| D29       | Millesianin B                                                                                                    | -9.13                               |
| D26       | Millesianin I                                                                                                    | -9.11                               |
| D20       | Durmillone                                                                                                       | -9.02                               |
| D7        | Galocatechin                                                                                                     | -8.92                               |
| D34       | Caviunin                                                                                                         | -8.91                               |

|     |                                                                    |       |
|-----|--------------------------------------------------------------------|-------|
| D4  | Isoliquiritigenin                                                  | -8.83 |
| D5  | Liquiritigenin                                                     | -8.82 |
| D1  | Mildiside A                                                        | -8.74 |
| D3  | Ononin                                                             | -8.67 |
| D36 | Daidzein                                                           | -8.60 |
| D35 | Cladrastin                                                         | -8.54 |
| D37 | Hernancorizin                                                      | -8.54 |
| D28 | Millesianin A                                                      | -8.53 |
| D8  | Catechin                                                           | -8.52 |
| D10 | Tupichinol C                                                       | -8.51 |
| D17 | Durallone                                                          | -8.45 |
| D21 | Methoxycalpogonium isoflavone A                                    | -8.44 |
| D11 | (+)-Epicatechin                                                    | -8.39 |
| D2  | Formononetin                                                       | -8.39 |
| D32 | Millesianin E                                                      | -8.39 |
| D22 | Calopogonium isoflavone A                                          | -8.33 |
| D44 | 7-hydroxy-4',8-dimethoxyisoflavone-7-O- $\beta$ -D-glucopyranoside | -8.23 |
| D27 | Dielsianone                                                        | -8.21 |
| D9  | (3S)-Vestitol                                                      | -8.15 |
| D6  | Naringenin                                                         | -7.99 |
| D43 | Wistin                                                             | -7.82 |
| D33 | Afromosin                                                          | -7.76 |
| D15 | <i>Trans</i> -3-O-p-hydroxycinnamoyl ursolic acid                  | -7.06 |
| D14 | <i>Trans</i> -Ferulic acid                                         | -6.80 |
| D13 | Protocatechuic acid                                                | -5.51 |

Table S2: *In silico* Docking of isolated compounds from *Millettia dielsiana* against PDE4B protein

| Compounds | Name                                                                                                             | $\Delta G_{\text{dock}}$ (kcal/mol) |
|-----------|------------------------------------------------------------------------------------------------------------------|-------------------------------------|
| D38       | Millesianin F                                                                                                    | -11.26                              |
| D50       | 5,7,4'-trihydroxyisoflavone 7-O- $\beta$ -D-apiofuranosyl-(1 $\rightarrow$ 6)- $\beta$ -D-glucopyranoside        | -13.01                              |
| D45       | 7-hydroxy-4',8-dimethoxyisoflavone 7-O- $\beta$ -D-apiofuranosyl-(1 $\rightarrow$ 6)- $\beta$ -D-glucopyranoside | -10.97                              |
| D47       | Odoratin-7-O- $\beta$ -D-glucopyranoside                                                                         | -10.86                              |
| D41       | Claclrastin-7-O- $\beta$ -D-glucopyranoside                                                                      | -10.77                              |
| D39       | Millesianin G                                                                                                    | -10.73                              |
| D42       | 7-hydroxy-4',6 dimethoxyisoflavone-7-O- $\beta$ -D-apiofuranosyl-(1 $\rightarrow$ 6)- $\beta$ -D-glucopyranoside | -10.57                              |
| D23       | Hydroxy-6-methoxy-3,4-methylenedioxy-8,3,3-dimethylallyl-isoflavone                                              | -8.95                               |
| D19       | Ichthynone                                                                                                       | -9.54                               |
| D46       | Glycitin                                                                                                         | -8.34                               |
| D25       | Millesianin D                                                                                                    | -8.75                               |
| D24       | Millesianin H                                                                                                    | -8.54                               |
| D48       | Dalpatin                                                                                                         | -8.83                               |
| D30       | Millesianin C                                                                                                    | -9.27                               |
| D18       | Barbigerone                                                                                                      | -8.6                                |
| D49       | Genistin                                                                                                         | -9.63                               |
| D40       | Daidzin                                                                                                          | -9.6                                |
| D29       | Millesianin B                                                                                                    | -8.65                               |
| D26       | Millesianin I                                                                                                    | -8.96                               |
| D20       | Durmillone                                                                                                       | -8.89                               |
| D7        | Gallocatechin                                                                                                    | -8.55                               |
| D34       | Caviunin                                                                                                         | -7.87                               |
| D4        | Isoliquiritigenin                                                                                                | -8.52                               |
| D5        | Liquiritigenin                                                                                                   | -8.5                                |
| D1        | Mildiside A                                                                                                      | -7.95                               |
| D3        | Ononin                                                                                                           | -7.8                                |
| D36       | Daidzein                                                                                                         | -8.98                               |
| D35       | Cladrastin                                                                                                       | -8.44                               |
| D37       | Hernancorizin                                                                                                    | -8.29                               |
| D28       | Millesianin A                                                                                                    | -8.25                               |
| D8        | Catechin                                                                                                         | -8.06                               |
| D10       | Tupichinol C                                                                                                     | -8.61                               |
| D17       | Durallone                                                                                                        | -8.1                                |
| D21       | Methoxycalponium isoflavone A                                                                                    | -7.45                               |
| D11       | (+)-Epicatechin                                                                                                  | -8.06                               |
| D2        | Formononetin                                                                                                     | -8.73                               |
| D32       | Millesianin E                                                                                                    | -9.72                               |
| D22       | Calopogonium isoflavone A                                                                                        | -8.73                               |
| D44       | 7-hydroxy-4',8-dimethoxyisoflavone-7-O- $\beta$ -D-glucopyranoside                                               | -8.78                               |
| D27       | Dielsianone                                                                                                      | -8.01                               |

|     |                                                   |       |
|-----|---------------------------------------------------|-------|
|     |                                                   |       |
| D9  | (3S)-Vestitol                                     | -8.15 |
| D6  | Naringenin                                        | -7.59 |
| D43 | Wistin                                            | -8.53 |
| D33 | Afromosin                                         | -8.64 |
| D15 | <i>Trans</i> -3-O-p-hydroxycinnamoyl ursolic acid | -5.27 |
| D14 | <i>Trans</i> -Ferulic acid                        | -6.93 |
| D13 | Protocatechuic acid                               | -5.46 |

Table S3: *In silico* Docking of isolated compounds from *Millettia dielsiana* against PDE4D protein

| Compounds | Name                                                                                                             | $\Delta G_{dock}$<br>(kcal/mol) |
|-----------|------------------------------------------------------------------------------------------------------------------|---------------------------------|
| D38       | Millesianin F                                                                                                    | -11.4                           |
| D50       | 5,7,4'-trihydroxyisoflavone 7-O- $\beta$ -D-apiofuranosyl-(1 $\rightarrow$ 6)- $\beta$ -D-glucopyranoside        | -7.12                           |
| D45       | 7-hydroxy-4',8-dimethoxyisoflavone 7-O- $\beta$ -D-apiofuranosyl-(1 $\rightarrow$ 6)- $\beta$ -D-glucopyranoside | -9.99                           |
| D47       | Odoratin-7-O- $\beta$ -D-glucopyranoside                                                                         | -9.53                           |
| D41       | Claclrastin-7-O- $\beta$ -D-glucopyranoside                                                                      | -10.78                          |
| D39       | Millesianin G                                                                                                    | -12.12                          |
| D42       | 7-hydroxy-4',6 dimethoxyisoflavone-7-O- $\beta$ -D-apiofuranosyl-(1 $\rightarrow$ 6)- $\beta$ -D-glucopyranoside | -11.08                          |
| D23       | Hydroxy-6-methoxy-3,4-methylenedioxy-8,3,3-dimethylallyl-isoflavone                                              | -9.61                           |
| D19       | Ichthynone                                                                                                       | -9.63                           |
| D46       | Glycitin                                                                                                         | -10.53                          |
| D25       | Millesianin D                                                                                                    | -9.54                           |
| D24       | Millesianin H                                                                                                    | -9.16                           |
| D48       | Dalpatin                                                                                                         | -9.04                           |
| D30       | Millesianin C                                                                                                    | -9.14                           |
| D18       | Barbigerone                                                                                                      | -8.83                           |
| D49       | Genistin                                                                                                         | -10.21                          |
| D40       | Daidzin                                                                                                          | -10.06                          |
| D29       | Millesianin B                                                                                                    | -8.85                           |
| D26       | Millesianin I                                                                                                    | -8.69                           |
| D20       | Durmillone                                                                                                       | -8.63                           |
| D7        | Gallocatechin                                                                                                    | -9.04                           |
| D34       | Caviunin                                                                                                         | -8.58                           |
| D4        | Isoliquiritigenin                                                                                                | -6.95                           |

|     |                                                                    |       |
|-----|--------------------------------------------------------------------|-------|
| D5  | Liquiritigenin                                                     | -8.41 |
| D1  | Mildiside A                                                        | -8.64 |
| D3  | Ononin                                                             | -8.52 |
| D36 | Daidzein                                                           | -8.62 |
| D35 | Cladrastin                                                         | -9.14 |
| D37 | Hernancorizin                                                      | -8.47 |
| D28 | Millesianin A                                                      | -9.19 |
| D8  | Catechin                                                           | -8.19 |
| D10 | Tupichinol C                                                       | -8.79 |
| D17 | Durallone                                                          | -8.16 |
| D21 | Methoxycalponium isoflavone A                                      | -8.19 |
| D11 | (+)-Epicatechin                                                    | -8.03 |
| D2  | Formononetin                                                       | -8.36 |
| D32 | Millesianin E                                                      | -9.02 |
| D22 | Calopogonium isoflavone A                                          | -8.06 |
| D44 | 7-hydroxy-4',8-dimethoxyisoflavone-7-O- $\beta$ -D-glucopyranoside | -9.67 |
| D27 | Dielsianone                                                        | -8.02 |
| D9  | (3S)-Vestitol                                                      | -8.27 |
| D6  | Naringenin                                                         | -7.28 |
| D43 | Wistin                                                             | -9.19 |
| D33 | Afromosin                                                          | -8.61 |
| D15 | Trans-3-O-p-hydroxycinnamoyl ursolic acid                          | -7.6  |
| D14 | Trans-Ferulic acid                                                 | -7.45 |
| D13 | Protocatechuic acid                                                | -5.8  |

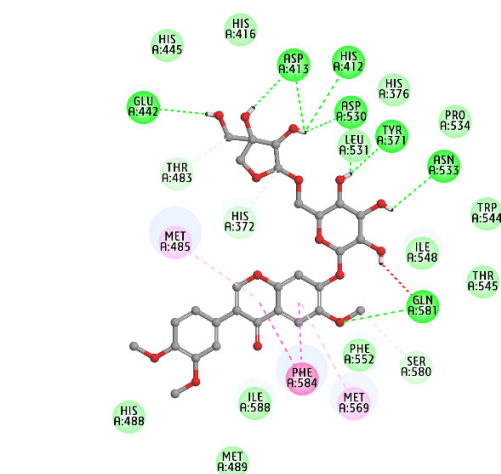

#### Interactions

- van der Waals
- Conventional Hydrogen Bond
- Carbon Hydrogen Bond
- Unfavorable Donor-Donor
- Pi-Pi Stacked
- Pi-Alkyl

**D38**

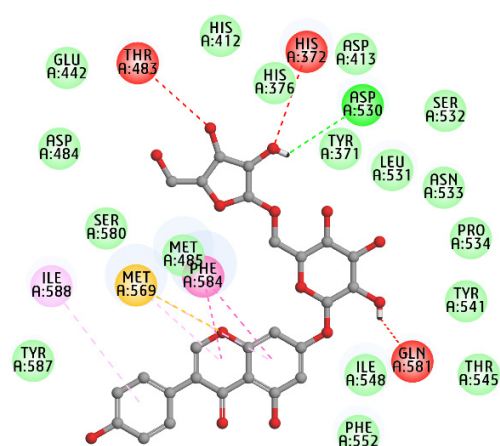

#### Interactions

- van der Waals
- Conventional Hydrogen Bond
- Sulfur-X
- Unfavorable Donor-Donor
- Unfavorable Acceptor-Acceptor
- Pi-Pi Stacked
- Pi-Alkyl

**D50**

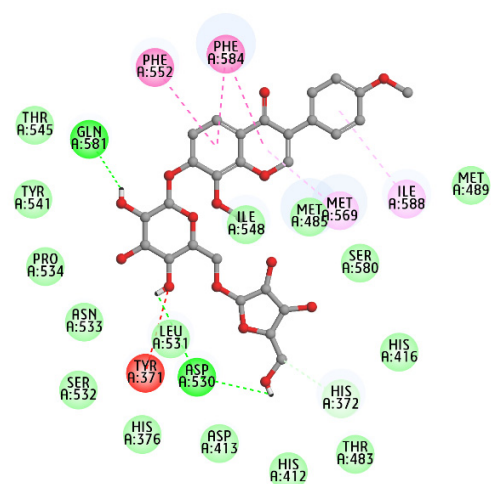

#### Interactions

- van der Waals
- Conventional Hydrogen Bond
- Carbon Hydrogen Bond
- Unfavorable Donor-Donor
- Pi-Pi Stacked
- Pi-Pi T-shaped
- Pi-Alkyl
- Unfavorable Acceptor-Acceptor

**D45**

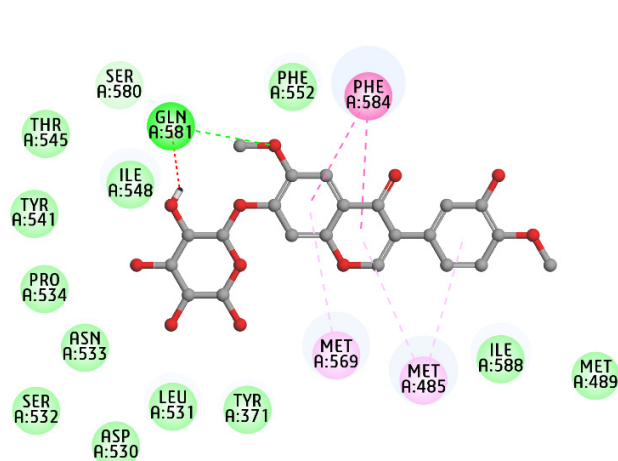

#### Interactions

- van der Waals
- Conventional Hydrogen Bond
- Carbon Hydrogen Bond
- Unfavorable Donor-Donor
- Pi-Pi Stacked
- Pi-Alkyl
- Unfavorable Acceptor-Acceptor

**D47**

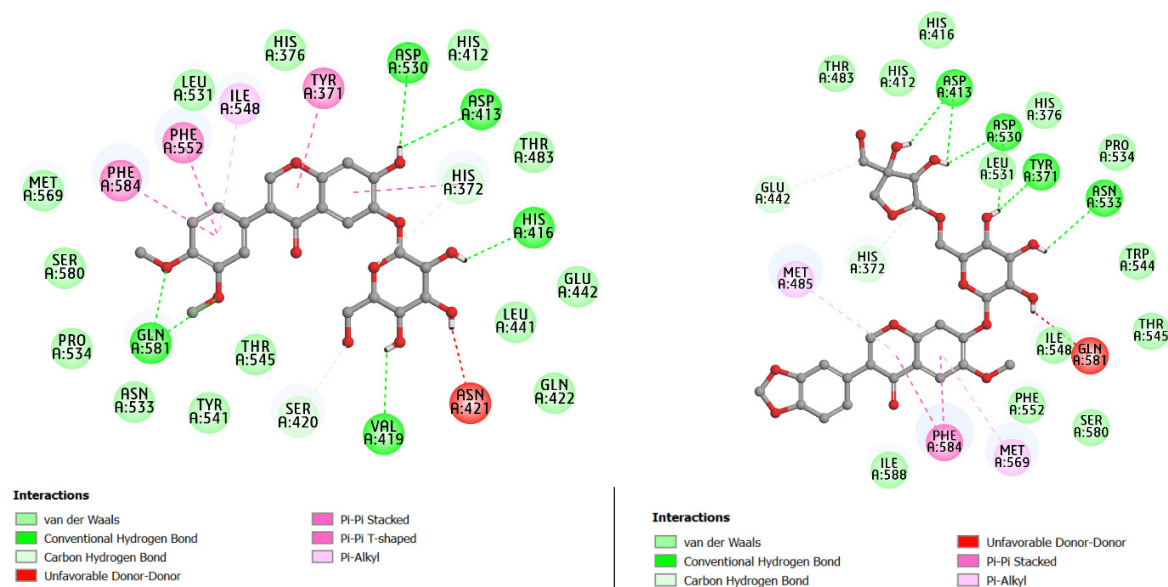

**D41**

**D39**

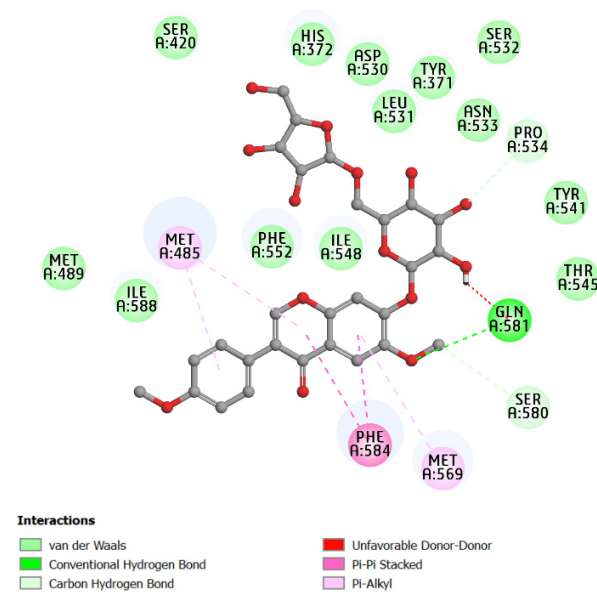

**D42**

**Figure S1.** 2D representation of binding interaction of the hit compounds and the amino acid residues of PDE4A enzyme (PDB ID: 3TVX).

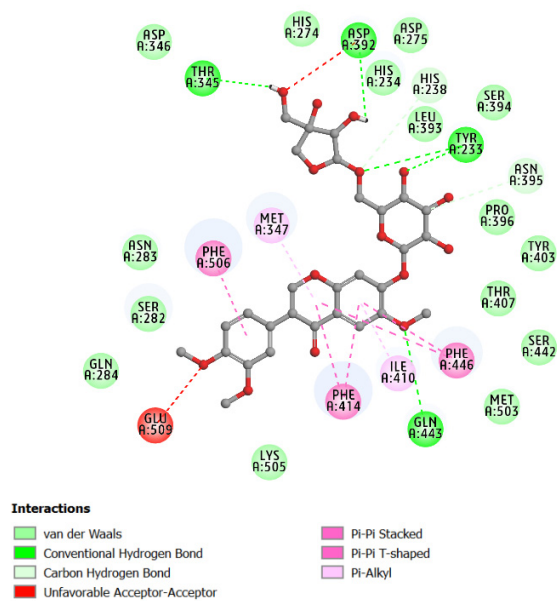

**D38**

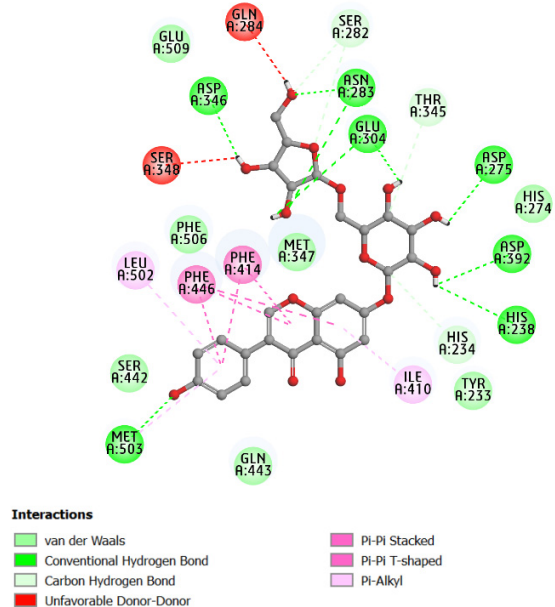

**D50**

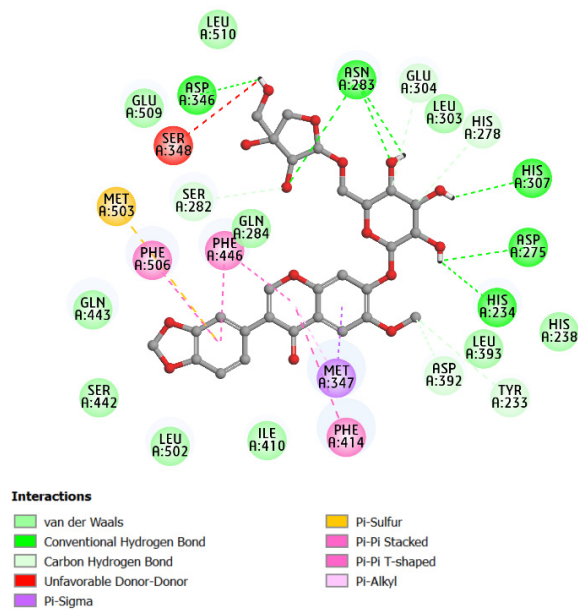

**D39**

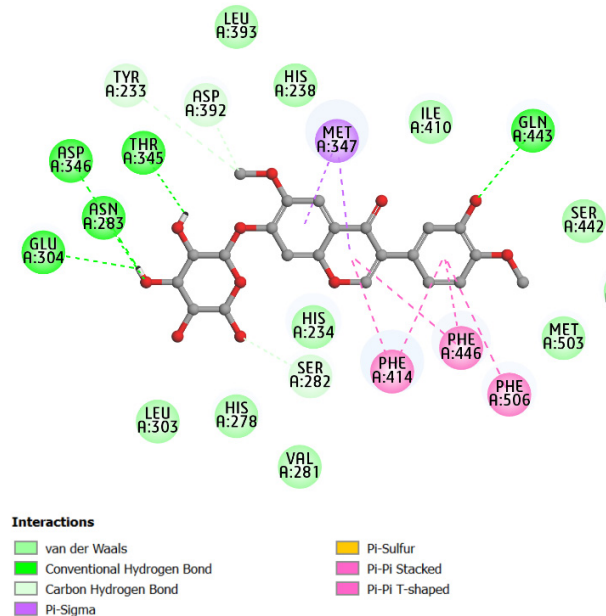

**D47**

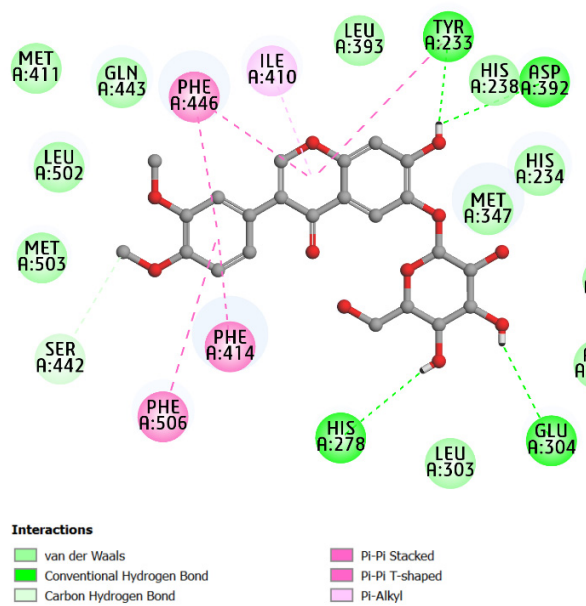

**D41**

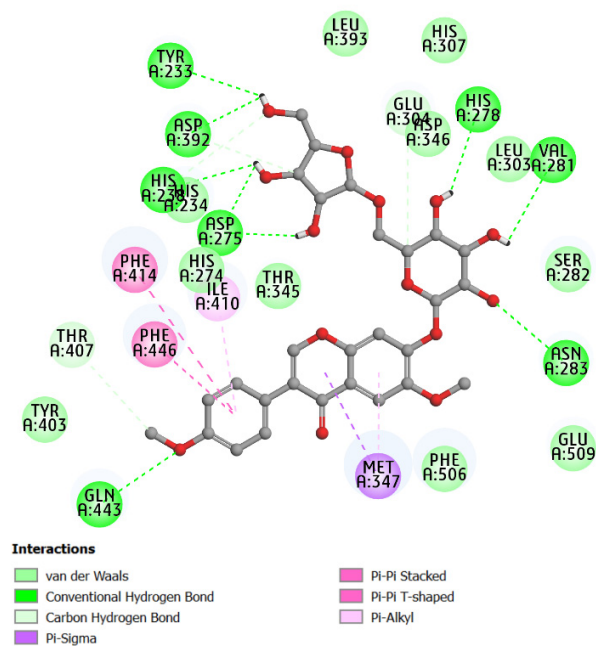

**D42**

**Figure S2.** 2D representation of binding interaction of the hit compounds and the amino acid residues of PDE4B enzyme (PDB ID: 3W5E).

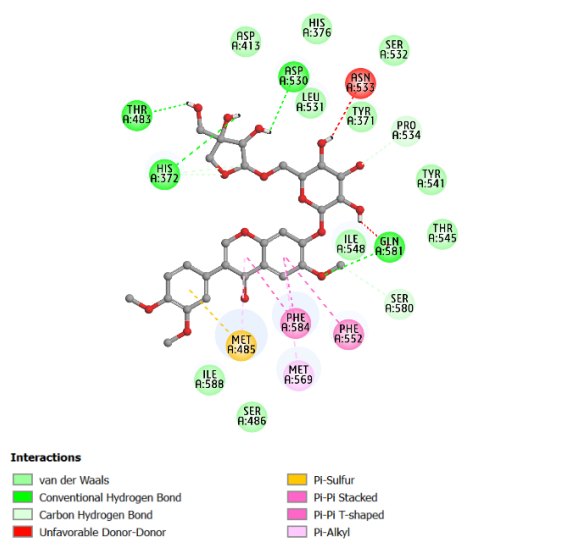

**D38**

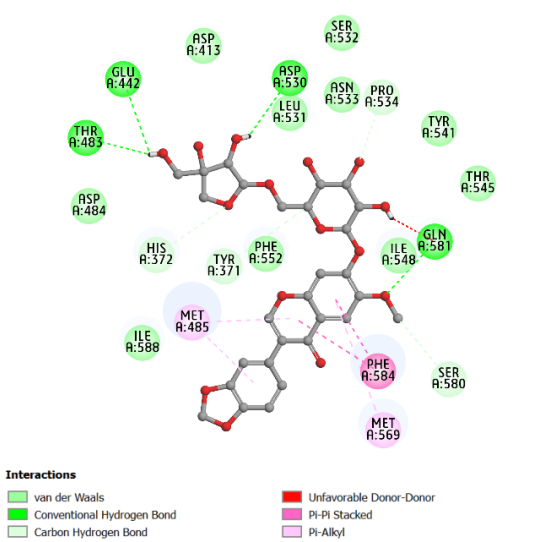

**D39**

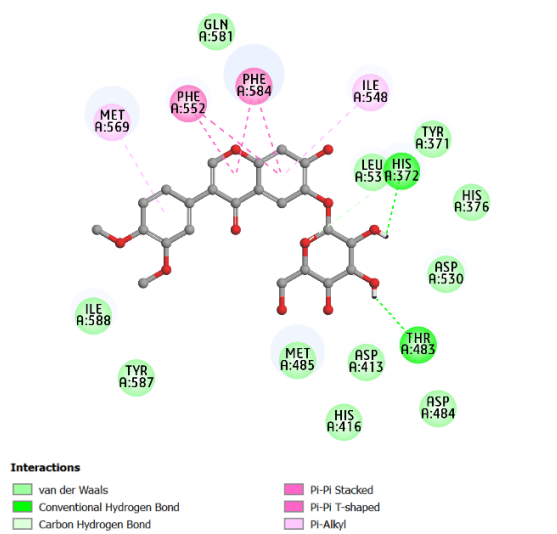

**D41**

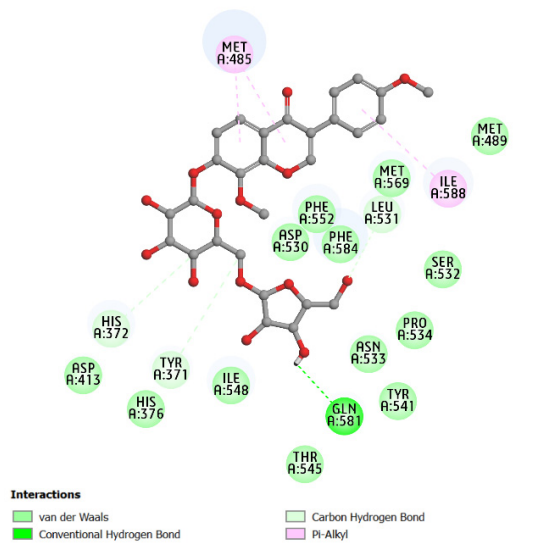

**D45**

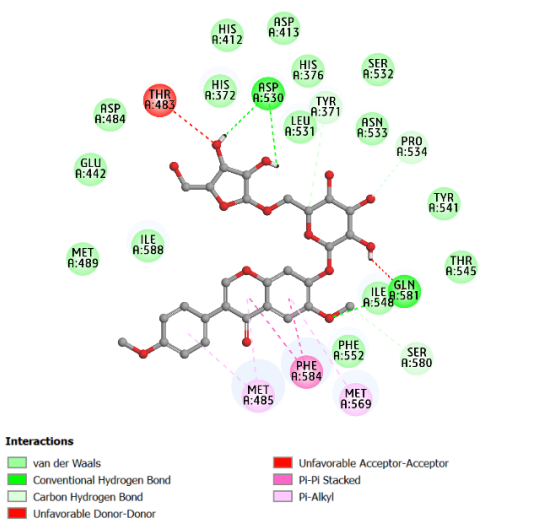

**D42**

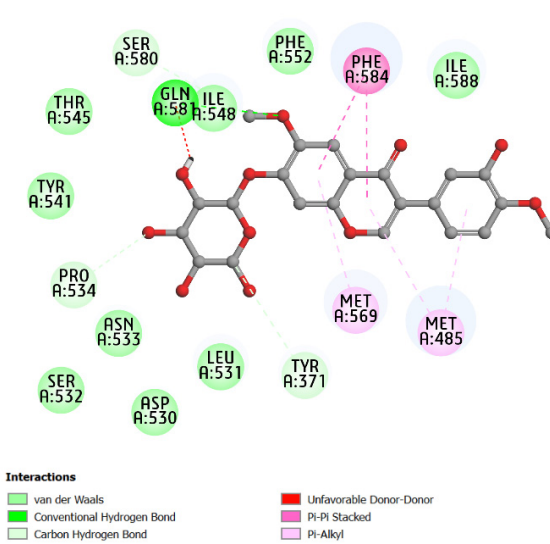

**D47**

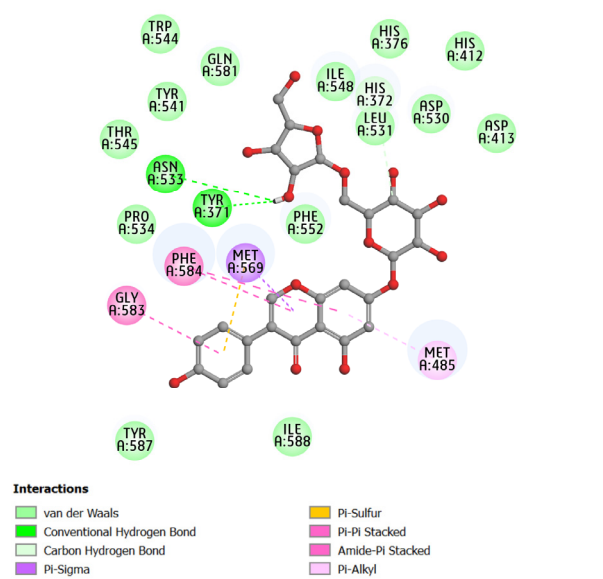

**D50**

Figure S3. 2D interaction diagrams of the studied compounds from MD-refined structures of these complexes with PDE4A were analyzed at a time of 100 ns

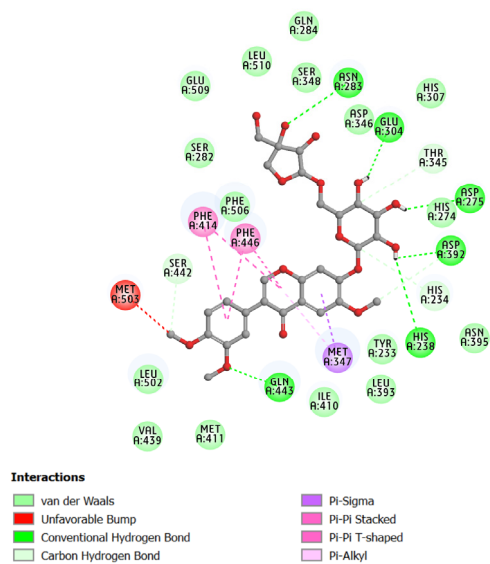

**D38**

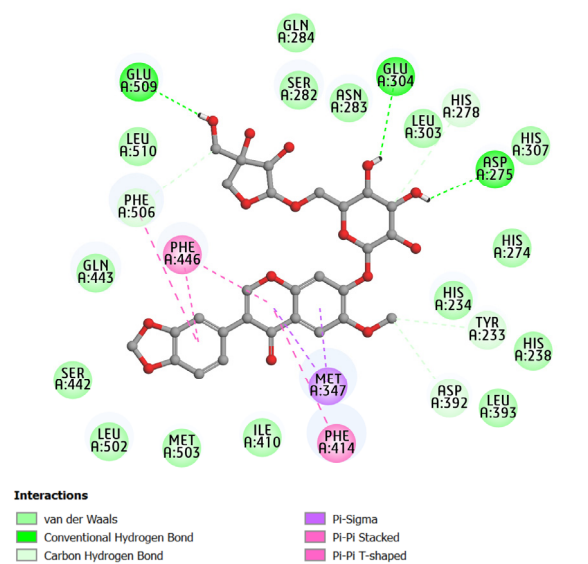

**D39**

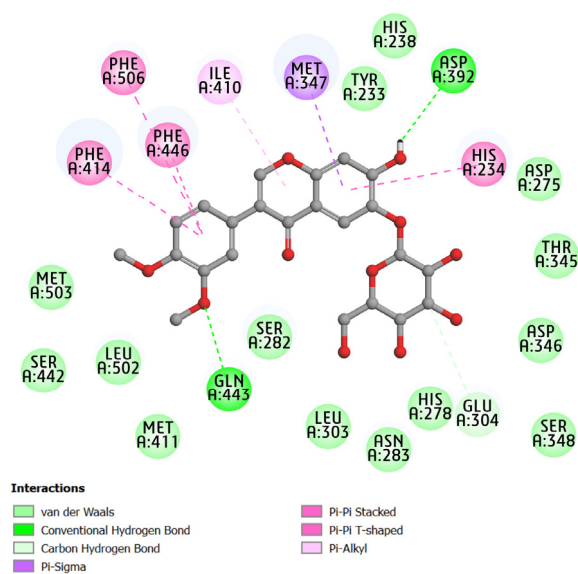

**D41**

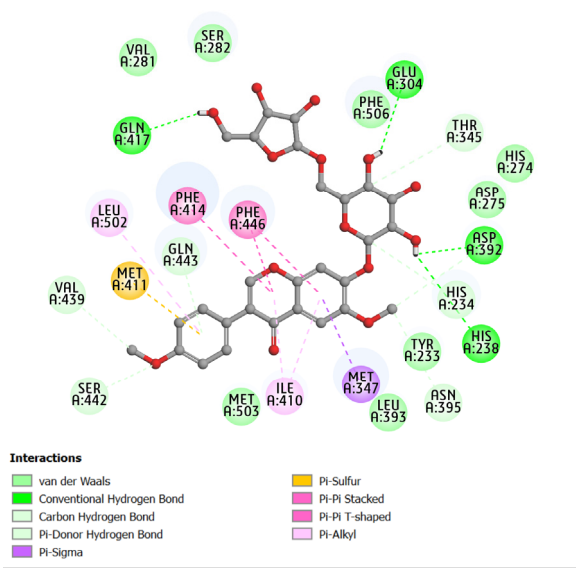

**D42**

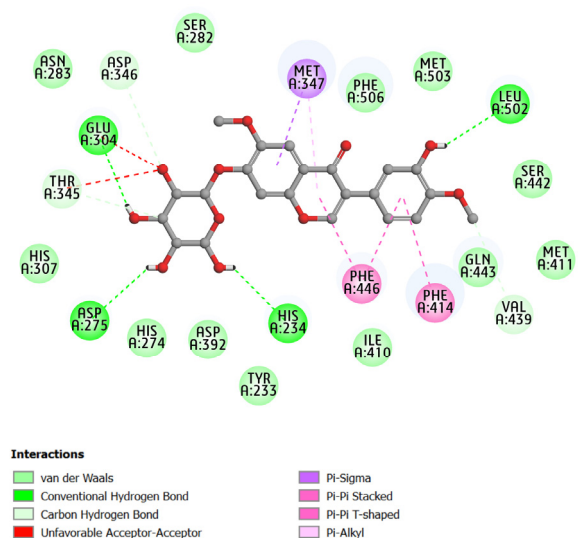

**D47**

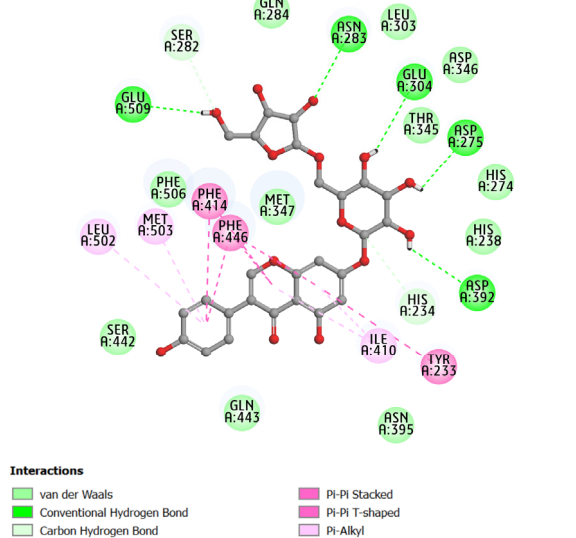

**D50**

Figure S4. 2D interaction diagrams of the studied compounds from MD-refined structures of these complexes with PDE4B were analyzed at a time of 100 ns

Table S4. Acute oral toxicity prediction obtained by using the ProTox-II web server

| Entry | Compound name                                                                                                    | LD <sub>50</sub><br>(mg/kg) | Toxicity<br>class |
|-------|------------------------------------------------------------------------------------------------------------------|-----------------------------|-------------------|
| D38   | Millesianin F                                                                                                    | 5000                        | 5                 |
| D39   | Millesianin G                                                                                                    | 5000                        | 5                 |
| D41   | Claclrastin-7-O- $\beta$ -D-glucopyranoside                                                                      | 5000                        | 5                 |
| D42   | 7-hydroxy-4',6 dimethoxyisoflavone-7-O- $\beta$ -D-apiofuranosyl-(1 $\rightarrow$ 6)- $\beta$ -D-glucopyranoside | 5000                        | 5                 |
| D45   | 7-hydroxy-4',8-dimethoxyisoflavone 7-O- $\beta$ -D-apiofuranosyl-(1 $\rightarrow$ 6)- $\beta$ -D-glucopyranoside | 5000                        | 5                 |
| D47   | Odoratin-7-O- $\beta$ -D-glucopyranoside                                                                         | 5000                        | 5                 |
| D50   | 5,7,4'-trihydroxyisoflavone 7-O- $\beta$ -D-apiofuranosyl-(1 $\rightarrow$ 6)- $\beta$ -D-glucopyranoside        | 5000                        | 5                 |
| Ref   | 3KQ                                                                                                              | 2000                        | 4                 |
|       | NVW                                                                                                              | 780                         | 4                 |
|       | pentoxifylline                                                                                                   | 780                         | 4                 |

Table S5. Organ toxicity, toxicological endpoints, and toxicological pathways predicted activity calculated using the ProTox-II web server

D39

Toxicity Model Report

| Classification                             | Target                                                                                | Shorthand     | Prediction | Probability |
|--------------------------------------------|---------------------------------------------------------------------------------------|---------------|------------|-------------|
| Organ toxicity                             | Hepatotoxicity                                                                        | dili          | Inactive   | 0.88        |
| Toxicity end points                        | Carcinogenicity                                                                       | carcino       | Inactive   | 0.78        |
| Toxicity end points                        | Immunotoxicity                                                                        | immuno        | Active     | 0.99        |
| Toxicity end points                        | Mutagenicity                                                                          | mutagen       | Inactive   | 0.57        |
| Toxicity end points                        | Cytotoxicity                                                                          | cyto          | Inactive   | 0.75        |
| Tox21-Nuclear receptor signalling pathways | Aryl hydrocarbon Receptor (AhR)                                                       | nr_ahr        | Inactive   | 0.78        |
| Tox21-Nuclear receptor signalling pathways | Androgen Receptor (AR)                                                                | nr_ar         | Inactive   | 0.98        |
| Tox21-Nuclear receptor signalling pathways | Androgen Receptor Ligand Binding Domain (AR-LBD)                                      | nr_ar_lbd     | Inactive   | 0.94        |
| Tox21-Nuclear receptor signalling pathways | Aromatase                                                                             | nr_aromatase  | Inactive   | 0.82        |
| Tox21-Nuclear receptor signalling pathways | Estrogen Receptor Alpha (ER)                                                          | nr_er         | Inactive   | 0.85        |
| Tox21-Nuclear receptor signalling pathways | Estrogen Receptor Ligand Binding Domain (ER-LBD)                                      | nr_er_lbd     | Inactive   | 0.97        |
| Tox21-Nuclear receptor signalling pathways | Peroxisome Proliferator Activated Receptor Gamma (PPAR-Gamma)                         | nr_ppar_gamma | Inactive   | 0.87        |
| Tox21-Stress response pathways             | Nuclear factor (erythroid-derived 2)-like 2/antioxidant responsive element (nrf2/ARE) | sr_are        | Inactive   | 0.85        |
| Tox21-Stress response pathways             | Heat shock factor response element (HSE)                                              | sr_hse        | Inactive   | 0.85        |
| Tox21-Stress response pathways             | Mitochondrial Membrane Potential (MMP)                                                | sr_mmp        | Inactive   | 0.72        |
| Tox21-Stress response pathways             | Phosphoprotein (Tumor Suppressor) p53                                                 | sr_p53        | Inactive   | 0.50        |
| Tox21-Stress response pathways             | ATPase family AAA domain-containing protein 5 (ATAD5)                                 | sr_atad5      | Inactive   | 0.90        |

D38

Toxicity Model Report

| Classification                             | Target                                                                                | Shorthand     | Prediction | Probability |
|--------------------------------------------|---------------------------------------------------------------------------------------|---------------|------------|-------------|
| Organ toxicity                             | Hepatotoxicity                                                                        | dili          | Inactive   | 0.88        |
| Toxicity end points                        | Carcinogenicity                                                                       | carcino       | Inactive   | 0.83        |
| Toxicity end points                        | Immunotoxicity                                                                        | immuno        | Active     | 0.99        |
| Toxicity end points                        | Mutagenicity                                                                          | mutagen       | Inactive   | 0.67        |
| Toxicity end points                        | Cytotoxicity                                                                          | cyto          | Inactive   | 0.67        |
| Tox21-Nuclear receptor signalling pathways | Aryl hydrocarbon Receptor (AhR)                                                       | nr_ahr        | Inactive   | 0.82        |
| Tox21-Nuclear receptor signalling pathways | Androgen Receptor (AR)                                                                | nr_ar         | Inactive   | 0.98        |
| Tox21-Nuclear receptor signalling pathways | Androgen Receptor Ligand Binding Domain (AR-LBD)                                      | nr_ar_lbd     | Inactive   | 0.93        |
| Tox21-Nuclear receptor signalling pathways | Aromatase                                                                             | nr_aromatase  | Inactive   | 0.76        |
| Tox21-Nuclear receptor signalling pathways | Estrogen Receptor Alpha (ER)                                                          | nr_er         | Inactive   | 0.85        |
| Tox21-Nuclear receptor signalling pathways | Estrogen Receptor Ligand Binding Domain (ER-LBD)                                      | nr_er_lbd     | Inactive   | 0.92        |
| Tox21-Nuclear receptor signalling pathways | Peroxisome Proliferator Activated Receptor Gamma (PPAR-Gamma)                         | nr_ppar_gamma | Inactive   | 0.82        |
| Tox21-Stress response pathways             | Nuclear factor (erythroid-derived 2)-like 2/antioxidant responsive element (nrf2/ARE) | sr_are        | Inactive   | 0.86        |
| Tox21-Stress response pathways             | Heat shock factor response element (HSE)                                              | sr_hse        | Inactive   | 0.86        |
| Tox21-Stress response pathways             | Mitochondrial Membrane Potential (MMP)                                                | sr_mmp        | Inactive   | 0.69        |
| Tox21-Stress response pathways             | Phosphoprotein (Tumor Suppressor) p53                                                 | sr_p53        | Active     | 0.54        |
| Tox21-Stress response pathways             | ATPase family AAA domain-containing protein 5 (ATAD5)                                 | sr_atad5      | Inactive   | 0.88        |

D41

## Toxicity Model Report

| Classification                             | Target                                                                                | Shorthand     | Prediction | Probability |
|--------------------------------------------|---------------------------------------------------------------------------------------|---------------|------------|-------------|
| Organ toxicity                             | Hepatotoxicity                                                                        | dili          | Inactive   | 0.83        |
| Toxicity end points                        | Carcinogenicity                                                                       | carcino       | Inactive   | 0.93        |
| Toxicity end points                        | Immunotoxicity                                                                        | immuno        | Active     | 0.96        |
| Toxicity end points                        | Mutagenicity                                                                          | mutagen       | Inactive   | 0.77        |
| Toxicity end points                        | Cytotoxicity                                                                          | cyto          | Active     | 0.50        |
| Tox21-Nuclear receptor signalling pathways | Aryl hydrocarbon Receptor (AhR)                                                       | nr_ahr        | Active     | 0.61        |
| Tox21-Nuclear receptor signalling pathways | Androgen Receptor (AR)                                                                | nr_ar         | Inactive   | 0.99        |
| Tox21-Nuclear receptor signalling pathways | Androgen Receptor Ligand Binding Domain (AR-LBD)                                      | nr_ar_lbd     | Inactive   | 0.99        |
| Tox21-Nuclear receptor signalling pathways | Aromatase                                                                             | nr_aromatase  | Inactive   | 0.99        |
| Tox21-Nuclear receptor signalling pathways | Estrogen Receptor Alpha (ER)                                                          | nr_er         | Inactive   | 0.98        |
| Tox21-Nuclear receptor signalling pathways | Estrogen Receptor Ligand Binding Domain (ER-LBD)                                      | nr_er_lbd     | Inactive   | 0.99        |
| Tox21-Nuclear receptor signalling pathways | Peroxisome Proliferator Activated Receptor Gamma (PPAR-Gamma)                         | nr_ppar_gamma | Inactive   | 0.99        |
| Tox21-Stress response pathways             | Nuclear factor (erythroid-derived 2)-like 2/antioxidant responsive element (nrf2/ARE) | sr_are        | Inactive   | 0.99        |
| Tox21-Stress response pathways             | Heat shock factor response element (HSE)                                              | sr_hse        | Inactive   | 0.99        |
| Tox21-Stress response pathways             | Mitochondrial Membrane Potential (MMP)                                                | sr_mmp        | Inactive   | 0.99        |
| Tox21-Stress response pathways             | Phosphoprotein (Tumor Suppressor) p53                                                 | sr_p53        | Inactive   | 0.90        |
| Tox21-Stress response pathways             | ATPase family AAA domain-containing protein 5 (ATAD5)                                 | sr_atad5      | Inactive   | 0.99        |

D42

## Toxicity Model Report

| Classification                             | Target                                                                                | Shorthand     | Prediction | Probability |
|--------------------------------------------|---------------------------------------------------------------------------------------|---------------|------------|-------------|
| Organ toxicity                             | Hepatotoxicity                                                                        | dili          | Inactive   | 0.84        |
| Toxicity end points                        | Carcinogenicity                                                                       | carcino       | Inactive   | 0.85        |
| Toxicity end points                        | Immunotoxicity                                                                        | immuno        | Active     | 0.97        |
| Toxicity end points                        | Mutagenicity                                                                          | mutagen       | Inactive   | 0.73        |
| Toxicity end points                        | Cytotoxicity                                                                          | cyto          | Inactive   | 0.64        |
| Tox21-Nuclear receptor signalling pathways | Aryl hydrocarbon Receptor (AhR)                                                       | nr_ahr        | Inactive   | 0.57        |
| Tox21-Nuclear receptor signalling pathways | Androgen Receptor (AR)                                                                | nr_ar         | Inactive   | 0.97        |
| Tox21-Nuclear receptor signalling pathways | Androgen Receptor Ligand Binding Domain (AR-LBD)                                      | nr_ar_lbd     | Inactive   | 0.99        |
| Tox21-Nuclear receptor signalling pathways | Aromatase                                                                             | nr_aromatase  | Inactive   | 0.97        |
| Tox21-Nuclear receptor signalling pathways | Estrogen Receptor Alpha (ER)                                                          | nr_er         | Inactive   | 0.91        |
| Tox21-Nuclear receptor signalling pathways | Estrogen Receptor Ligand Binding Domain (ER-LBD)                                      | nr_er_lbd     | Inactive   | 0.99        |
| Tox21-Nuclear receptor signalling pathways | Peroxisome Proliferator Activated Receptor Gamma (PPAR-Gamma)                         | nr_ppar_gamma | Inactive   | 0.93        |
| Tox21-Stress response pathways             | Nuclear factor (erythroid-derived 2)-like 2/antioxidant responsive element (nrf2/ARE) | sr_are        | Inactive   | 0.85        |
| Tox21-Stress response pathways             | Heat shock factor response element (HSE)                                              | sr_hse        | Inactive   | 0.85        |
| Tox21-Stress response pathways             | Mitochondrial Membrane Potential (MMP)                                                | sr_mmp        | Inactive   | 0.85        |
| Tox21-Stress response pathways             | Phosphoprotein (Tumor Suppressor) p53                                                 | sr_p53        | Inactive   | 0.55        |
| Tox21-Stress response pathways             | ATPase family AAA domain-containing protein 5 (ATAD5)                                 | sr_atad5      | Inactive   | 0.92        |

D45

## Toxicity Model Report

| Classification                             | Target                                                                                | Shorthand     | Prediction | Probability |
|--------------------------------------------|---------------------------------------------------------------------------------------|---------------|------------|-------------|
| Organ toxicity                             | Hepatotoxicity                                                                        | dili          | Inactive   | 0.84        |
| Toxicity end points                        | Carcinogenicity                                                                       | carcino       | Inactive   | 0.85        |
| Toxicity end points                        | Immunotoxicity                                                                        | immuno        | Active     | 0.87        |
| Toxicity end points                        | Mutagenicity                                                                          | mutagen       | Inactive   | 0.73        |
| Toxicity end points                        | Cytotoxicity                                                                          | cyto          | Inactive   | 0.64        |
| Tox21-Nuclear receptor signalling pathways | Aryl hydrocarbon Receptor (AhR)                                                       | nr_ahr        | Inactive   | 0.57        |
| Tox21-Nuclear receptor signalling pathways | Androgen Receptor (AR)                                                                | nr_ar         | Inactive   | 0.97        |
| Tox21-Nuclear receptor signalling pathways | Androgen Receptor Ligand Binding Domain (AR-LBD)                                      | nr_ar_lbd     | Inactive   | 0.99        |
| Tox21-Nuclear receptor signalling pathways | Aromatase                                                                             | nr_aromatase  | Inactive   | 0.97        |
| Tox21-Nuclear receptor signalling pathways | Estrogen Receptor Alpha (ER)                                                          | nr_er         | Inactive   | 0.91        |
| Tox21-Nuclear receptor signalling pathways | Estrogen Receptor Ligand Binding Domain (ER-LBD)                                      | nr_er_lbd     | Inactive   | 0.99        |
| Tox21-Nuclear receptor signalling pathways | Peroxisome Proliferator Activated Receptor Gamma (PPAR-Gamma)                         | nr_ppar_gamma | Inactive   | 0.93        |
| Tox21-Stress response pathways             | Nuclear factor (erythroid-derived 2)-like 2/antioxidant responsive element (nrf2/ARE) | sr_are        | Inactive   | 0.85        |
| Tox21-Stress response pathways             | Heat shock factor response element (HSE)                                              | sr_hse        | Inactive   | 0.85        |
| Tox21-Stress response pathways             | Mitochondrial Membrane Potential (MMP)                                                | sr_mmp        | Inactive   | 0.85        |
| Tox21-Stress response pathways             | Phosphoprotein (Tumor Suppressor) p53                                                 | sr_p53        | Inactive   | 0.55        |
| Tox21-Stress response pathways             | ATPase family AAA domain-containing protein 5 (ATAD5)                                 | sr_atad5      | Inactive   | 0.92        |

D47

## Toxicity Model Report

| Classification                             | Target                                                                                | Shorthand     | Prediction | Probability |
|--------------------------------------------|---------------------------------------------------------------------------------------|---------------|------------|-------------|
| Organ toxicity                             | Hepatotoxicity                                                                        | dili          | Inactive   | 0.76        |
| Toxicity end points                        | Carcinogenicity                                                                       | carcino       | Inactive   | 0.53        |
| Toxicity end points                        | Immunotoxicity                                                                        | immuno        | Active     | 0.98        |
| Toxicity end points                        | Mutagenicity                                                                          | mutagen       | Inactive   | 0.69        |
| Toxicity end points                        | Cytotoxicity                                                                          | cyto          | Inactive   | 0.91        |
| Tox21-Nuclear receptor signalling pathways | Aryl hydrocarbon Receptor (AhR)                                                       | nr_ahr        | Active     | 0.61        |
| Tox21-Nuclear receptor signalling pathways | Androgen Receptor (AR)                                                                | nr_ar         | Inactive   | 0.99        |
| Tox21-Nuclear receptor signalling pathways | Androgen Receptor Ligand Binding Domain (AR-LBD)                                      | nr_ar_lbd     | Inactive   | 0.95        |
| Tox21-Nuclear receptor signalling pathways | Aromatase                                                                             | nr_aromatase  | Inactive   | 0.93        |
| Tox21-Nuclear receptor signalling pathways | Estrogen Receptor Alpha (ER)                                                          | nr_er         | Inactive   | 0.71        |
| Tox21-Nuclear receptor signalling pathways | Estrogen Receptor Ligand Binding Domain (ER-LBD)                                      | nr_er_lbd     | Inactive   | 0.77        |
| Tox21-Nuclear receptor signalling pathways | Peroxisome Proliferator Activated Receptor Gamma (PPAR-Gamma)                         | nr_ppar_gamma | Inactive   | 0.95        |
| Tox21-Stress response pathways             | Nuclear factor (erythroid-derived 2)-like 2/antioxidant responsive element (nrf2/ARE) | sr_are        | Inactive   | 0.88        |
| Tox21-Stress response pathways             | Heat shock factor response element (HSE)                                              | sr_hse        | Inactive   | 0.88        |
| Tox21-Stress response pathways             | Mitochondrial Membrane Potential (MMP)                                                | sr_mmp        | Inactive   | 0.50        |
| Tox21-Stress response pathways             | Phosphoprotein (Tumor Suppressor) p53                                                 | sr_p53        | Inactive   | 0.80        |
| Tox21-Stress response pathways             | ATPase family AAA domain-containing protein 5 (ATAD5)                                 | sr_atad5      | Inactive   | 0.66        |

D50

## Toxicity Model Report

| Classification                             | Target                                                                                | Shorthand     | Prediction | Probability |
|--------------------------------------------|---------------------------------------------------------------------------------------|---------------|------------|-------------|
| Organ toxicity                             | Hepatotoxicity                                                                        | dili          | Inactive   | 0.82        |
| Toxicity end points                        | Carcinogenicity                                                                       | carcino       | Inactive   | 0.79        |
| Toxicity end points                        | Immunotoxicity                                                                        | immuno        | Inactive   | 0.54        |
| Toxicity end points                        | Mutagenicity                                                                          | mutagen       | Inactive   | 0.72        |
| Toxicity end points                        | Cytotoxicity                                                                          | cyto          | Inactive   | 0.72        |
| Tox21-Nuclear receptor signalling pathways | Aryl hydrocarbon Receptor (AhR)                                                       | nr_ahr        | Inactive   | 0.87        |
| Tox21-Nuclear receptor signalling pathways | Androgen Receptor (AR)                                                                | nr_ar         | Inactive   | 0.86        |
| Tox21-Nuclear receptor signalling pathways | Androgen Receptor Ligand Binding Domain (AR-LBD)                                      | nr_ar_lbd     | Inactive   | 0.98        |
| Tox21-Nuclear receptor signalling pathways | Aromatase                                                                             | nr_aromatase  | Inactive   | 0.98        |
| Tox21-Nuclear receptor signalling pathways | Estrogen Receptor Alpha (ER)                                                          | nr_er         | Inactive   | 0.79        |
| Tox21-Nuclear receptor signalling pathways | Estrogen Receptor Ligand Binding Domain (ER-LBD)                                      | nr_er_lbd     | Inactive   | 0.99        |
| Tox21-Nuclear receptor signalling pathways | Peroxisome Proliferator Activated Receptor Gamma (PPAR-Gamma)                         | nr_ppar_gamma | Inactive   | 0.93        |
| Tox21-Stress response pathways             | Nuclear factor (erythroid-derived 2)-like 2/antioxidant responsive element (nrf2/ARE) | sr_are        | Inactive   | 0.89        |
| Tox21-Stress response pathways             | Heat shock factor response element (HSE)                                              | sr_hse        | Inactive   | 0.89        |
| Tox21-Stress response pathways             | Mitochondrial Membrane Potential (MMP)                                                | sr_mmp        | Inactive   | 0.88        |
| Tox21-Stress response pathways             | Phosphoprotein (Tumor Suppressor) p53                                                 | sr_p53        | Inactive   | 0.57        |
| Tox21-Stress response pathways             | ATPase family AAA domain-containing protein 5 (ATAD5)                                 | sr_atad5      | Inactive   | 0.95        |
